# Supplementary material for: The ST22 chronology for the Skytrain Ice Rise ice core – Part 2: An age model to the last interglacial and disturbed deep stratigraphy
Source: Copernicus journal article supplement (doi:10.5194/cp-19-851-2023), 2023-04-27
Supplement: Supplementary file 1 [file cp-19-851-2023-supplement.zip]

Archive with 7 entries (7 files):
- Table_S4.xlsx
- Table_S2.xlsx
- Table S1.xlsx
- cp-19-851-2023-supplement-title-page.pdf
- Table_S3.xlsx
- Supplement_textandfigs.pdf
- Table S5_Age_scale.xlsx
