# Supplementary material for: The ST22 chronology for the Skytrain Ice Rise ice core – Part 2: An age model to the last interglacial and disturbed deep stratigraphy
Source: Copernicus journal article supplement (doi:10.5194/cp-19-851-2023), 2023-04-27
Supplement: Supplementary file 1 [file cp-19-851-2023-supplement.zip › cp-19-851-2023-supplement-title-page.pdf]

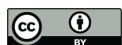

## *Supplement of*

# **The ST22 chronology for the Skytrain Ice Rise ice core – Part 2: An age model to the last interglacial and disturbed deep stratigraphy**

**Robert Mulvaney et al.**

*Correspondence to:* Eric W. Wolff (ew428@cam.ac.uk)

- cp-19-851-2023-supplement-title-page.pdf
- Supplement\_textandfigs.pdf
- Table S1.xlsx
- Table S5\_Age\_scale.xlsx
- Table\_S2.xlsx
- Table\_S3.xlsx
- Table\_S4.xlsx

The copyright of individual parts of the supplement might differ from the article licence.
