# Supplementary material for: The ST22 chronology for the Skytrain Ice Rise ice core – Part 2: An age model to the last interglacial and disturbed deep stratigraphy
Source: Copernicus journal article supplement (doi:10.5194/cp-19-851-2023), 2023-04-27
Supplement: Supplementary file 1 [file cp-19-851-2023-supplement.zip › Table S1.xlsx]

## Sheet: CH4
Concentrations of methane measured at University of Bern on discrete samples from Skytrain Ice Rise.
All depths are given as the middle of the sample, each sample 3-5 cm long
All concentrations have an estimated precision of 7 ppb, with an additional absoute uncertainty discussed in the text
Depth (m)	CH4 (ppb)
533.585	444.822
534.25	453.465
536.77	474.27
539.085	476.977
540.595	517.9
542.42	533.674
543.82	544.292
544.675	541.284
545.57	544.658
603.1	527.619
606.32	565.726
609.515	527.121
612.815	524.544
615.3	483.678
618.38	547.055
619.185	578.256
621.54	594.311
623.13	610.133
624.68	610.086
626.36	629.084
627.415	636.106
628.12	631.279
630.225	628.857
630.88	643.678
631.17	407.282
631.56	632.416
632.465	438.918
633.465	508.332
634.32	412.732
634.92	503.023
637.675	516.69
640.77	519.442
643.155	532.3
645.61	556.313
647.22	627.851

## Sheet: 18Oair
Concentrations of del18Oair measured at LSCE on discrete samples from Skytrain Ice Rise.
All depths are given as the middle of the sample, each sample 4-6 cm long
All d18O concentrations have an estimated precision of 0.03 permil
d15N values are shown in the cases where measured replicates agreed with a 1 sigma of 0.005 permil
Depth / m	δ18Oatm / permil	δ15N / permil
161.625	0.02	0.153
169.575	0.02	0.162
435.975	0.498382
446.425	0.685594
455.18	1.1308	0.144
467.18	1.01694	172
470.38	1.02158	0.235
602.38	0.52	0.146
603.135	0.56839
603.975	0.51	0.137
606.36	0.211197
609.565	0.534949
614.345	0.59	0.147
615.25	0.606643
618.26	0.29	0.15
619.14	0.0601041
621.5	-0.14	0.166
623.17	-0.276469
624.64	-0.31	0.161
626.395	-0.0237788
627.335	0.08	0.165
630.26	0.0384087
631.125	0.663116
631.605	0.517032
632.41	0.524935
633.5	0.620505
634.365	0.779366

## Sheet: Pairs
Pairs of CH4/del18Oair data from adjacent samples
Depth (m)	CH4 (ppb)	Depth / m	δ18Oatm / permil
603.1	527.619	603.135	0.56839
606.32	565.726	606.36	0.211197
609.515	527.121	609.565	0.534949
615.3	483.678	615.25	0.606643
618.38	547.055	618.26	0.29
619.185	578.256	619.14	0.0601041
621.54	594.311	621.5	-0.14
623.13	610.133	623.17	-0.276469
624.68	610.086	624.64	-0.31
626.36	629.084	626.395	-0.0237788
627.415	636.106	627.335	0.08
630.225	628.857	630.26	0.0384087
631.17	407.282	631.125	0.663116
631.56	632.416	631.605	0.517032
632.465	438.918	632.41	0.524935
633.465	508.332	633.5	0.620505
634.32	412.732	634.365	0.779366
