# Supplementary material for: The ST22 chronology for the Skytrain Ice Rise ice core – Part 2: An age model to the last interglacial and disturbed deep stratigraphy
Source: Copernicus journal article supplement (doi:10.5194/cp-19-851-2023), 2023-04-27
Supplement: Supplementary file 1 [file cp-19-851-2023-supplement.zip › Table S5_Age_scale.xlsx]

## Sheet: Sheet1
ALC age is the age given by Hoffmann et al (2022) based on known horizons interpolated by layer counting
PC indicates output from Paleochrono
ALC age is stopped at 1400 bp with ALC and PC age almost identical from 1337-1400 bp
Our recommended ice age scale uses ALC until 1337 a bp and PC for all older ages
Where appropriate ages are given in WD2014 and AICC2012 years before present (1950)
Sigma represents the Paleochrono uncertainty
We give no ages for ice we consider disturbed (605-617 m, >628 m, see text)
Depth	ALC age	PC_IceAge	PC_IceAge_WD	PC_IceAge_sigma	PC_AirAge	PC_AirAge_WD	PC_AirAge_sigma	we depth
m	a	a	a	yr	a	a	yr	m
0	-69							0
0.2	-68							0.1
0.4	-67							0.2
0.6	-67							0.2
0.8	-67							0.3
1	-66							0.4
1.2	-66							0.5
1.4	-65							0.6
1.6	-65							0.6
1.8	-64							0.7
2	-63							0.8
2.2	-63							0.9
2.4	-62							1
2.6	-61							1.1
2.8	-60							1.2
3	-60							1.3
3.2	-59							1.4
3.4	-59							1.5
3.6	-58							1.6
3.8	-57							1.7
4	-56							1.8
4.2	-55							1.9
4.4	-54							2
4.6	-53							2
4.8	-53							2.1
5	-52							2.2
5.2	-51							2.3
5.4	-51							2.4
5.6	-50							2.5
5.8	-49							2.6
6	-48							2.7
6.2	-47							2.8
6.4	-47							2.9
6.6	-46							3
6.8	-45							3.2
7	-45							3.3
7.2	-44							3.4
7.4	-43							3.5
7.6	-43							3.6
7.8	-42							3.7
8	-42							3.8
8.2	-40							3.9
8.4	-39							4
8.6	-39							4.1
8.8	-38							4.2
9	-38							4.3
9.2	-37							4.4
9.4	-36							4.6
9.6	-35							4.7
9.8	-34							4.8
10	-33							4.9
10.2	-33							5
10.4	-32							5.1
10.6	-31							5.2
10.8	-31							5.3
11	-30							5.5
11.2	-28							5.6
11.4	-28							5.7
11.6	-27							5.8
11.8	-26							5.9
12	-25							6
12.2	-24							6.1
12.4	-24							6.3
12.6	-23							6.4
12.8	-22							6.5
13	-21							6.6
13.2	-19							6.7
13.4	-19							6.9
13.6	-18							7
13.8	-17							7.1
14	-15							7.2
14.2	-13							7.3
14.4	-12							7.4
14.6	-12							7.5
14.8	-11							7.7
15	-10							7.8
15.2	-9							7.9
15.4	-8							8
15.6	-6							8.2
15.8	-4							8.3
16	-3							8.4
16.2	-2							8.5
16.4	0							8.6
16.6	1							8.7
16.8	2							8.9
17	4							9
17.2	5							9.1
17.4	6							9.2
17.6	7							9.4
17.8	8							9.5
18	9							9.6
18.2	11							9.7
18.4	12							9.9
18.6	13							10
18.8	14							10.1
19	15							10.2
19.2	17							10.4
19.4	18							10.5
19.6	19							10.6
19.8	20							10.7
20	21							10.9
20.2	22							11
20.4	24							11.1
20.6	24							11.3
20.8	25							11.4
21	26							11.5
21.2	27							11.6
21.4	28							11.8
21.6	30							11.9
21.8	30							12
22	32							12.1
22.2	33							12.3
22.4	35							12.4
22.6	36							12.5
22.8	38							12.7
23	39							12.8
23.2	40							12.9
23.4	41							13.1
23.6	42							13.2
23.8	43							13.3
24	45							13.5
24.2	46							13.6
24.4	48							13.7
24.6	49							13.8
24.8	51							14
25	52							14.1
25.2	53							14.2
25.4	54							14.4
25.6	55							14.5
25.8	56							14.7
26	56							14.8
26.2	57							14.9
26.4	58							15.1
26.6	59							15.2
26.8	60							15.3
27	62							15.5
27.2	63							15.6
27.4	64							15.7
27.6	65							15.9
27.8	66							16
28	67							16.1
28.2	68							16.3
28.4	69							16.4
28.6	69							16.5
28.8	71							16.7
29	73							16.8
29.2	74							17
29.4	75							17.1
29.6	77							17.3
29.8	78							17.4
30	80							17.5
30.2	81							17.7
30.4	83							17.8
30.6	84							18
30.8	85							18.1
31	87							18.2
31.2	88							18.4
31.4	88							18.5
31.6	90							18.6
31.8	91							18.8
32	92							18.9
32.2	94							19.1
32.4	96							19.2
32.6	96							19.4
32.8	98							19.5
33	100							19.7
33.2	101							19.8
33.4	102							19.9
33.6	103							20.1
33.8	105							20.2
34	106							20.4
34.2	107							20.5
34.4	108							20.7
34.6	110							20.8
34.8	111							21
35	113							21.1
35.2	114							21.3
35.4	116							21.4
35.6	117							21.5
35.8	118							21.7
36	119							21.8
36.2	120							22
36.4	122							22.1
36.6	123							22.3
36.8	124							22.4
37	125							22.6
37.2	127							22.7
37.4	128							22.9
37.6	129							23
37.8	131							23.2
38	132							23.3
38.2	134							23.5
38.4	136							23.6
38.6	137							23.8
38.8	138							23.9
39	140							24.1
39.2	142							24.2
39.4	143							24.4
39.6	145							24.5
39.8	146							24.7
40	149							24.8
40.2	150							25
40.4	152							25.1
40.6	153							25.3
40.8	156							25.4
41	157							25.6
41.2	158							25.7
41.4	160							25.9
41.6	162							26.1
41.8	164							26.2
42	166							26.4
42.2	167							26.5
42.4	170							26.7
42.6	171							26.8
42.8	174							27
43	176							27.1
43.2	178							27.3
43.4	180							27.5
43.6	182							27.6
43.8	184							27.8
44	185							27.9
44.2	187							28.1
44.4	189							28.2
44.6	190							28.4
44.8	192							28.6
45	195							28.7
45.2	198							28.9
45.4	200							29
45.6	202							29.2
45.8	203							29.3
46	204							29.5
46.2	206							29.7
46.4	207							29.8
46.6	209							30
46.8	210							30.1
47	212							30.3
47.2	214							30.5
47.4	216							30.6
47.6	217							30.8
47.8	218							30.9
48	220							31.1
48.2	222							31.3
48.4	224							31.4
48.6	225							31.6
48.8	227							31.7
49	229							31.9
49.2	231							32.1
49.4	232							32.2
49.6	233							32.4
49.8	235							32.5
50	236							32.7
50.2	237							32.9
50.4	238							33
50.6	240							33.2
50.8	242							33.4
51	243							33.5
51.2	244							33.7
51.4	246							33.8
51.6	248							34
51.8	250							34.2
52	252							34.3
52.2	254							34.5
52.4	255							34.6
52.6	257							34.8
52.8	258							35
53	261							35.1
53.2	262							35.3
53.4	264							35.5
53.6	266							35.6
53.8	268							35.8
54	269							36
54.2	271							36.1
54.4	272							36.3
54.6	274							36.5
54.8	276							36.6
55	278							36.8
55.2	280							37
55.4	282							37.1
55.6	283							37.3
55.8	285							37.5
56	287							37.7
56.2	288							37.8
56.4	290							38
56.6	291							38.1
56.8	292							38.3
57	294							38.5
57.2	297							38.6
57.4	298							38.8
57.6	299							39
57.8	301							39.1
58	303				10	13	19	39.3
58.2	305				13	15	19	39.5
58.4	307				15	17	19	39.7
58.6	309				17	19	19	39.8
58.8	311				19	21	19	40
59	313				21	23	15	40.2
59.2	315				22	25	15	40.3
59.4	318				24	26	13	40.5
59.6	319				26	28	18	40.7
59.8	321				28	30	17	40.8
60	323				30	32	12	41
60.2	325				31	33	10	41.2
60.4	326				32	35	16	41.3
60.6	327				34	37	16	41.5
60.8	328				35	38	13	41.7
61	330				37	40	20	41.8
61.2	332				40	43	18	42
61.4	333				41	44	14	42.2
61.6	335				43	46	11	42.3
61.8	338				44	48	15	42.5
62	340				46	49	11	42.7
62.2	343				47	50	11	42.8
62.4	344				48	52	10	43
62.6	347				50	53	9	43.2
62.8	350				51	54	9	43.3
63	351				52	55	13	43.5
63.2	352				53	57	17	43.7
63.4	355				56	59	17	43.8
63.6	356				57	61	11	44
63.8	358				59	62	15	44.2
64	361				61	64	14	44.3
64.2	363				62	66	10	44.5
64.4	366				64	67	11	44.7
64.6	368				65	69	16	44.9
64.8	371				68	71	21	45
65	372				70	74	14	45.2
65.2	374				71	75	10	45.4
65.4	376				73	76	9	45.5
65.6	378				74	78	15	45.7
65.8	381				76	80	21	45.9
66	383				79	83	22	46
66.2	386				82	86	18	46.2
66.4	387				83	88	11	46.4
66.6	389				85	89	13	46.5
66.8	390				87	91	17	46.7
67	393				89	94	18	46.9
67.2	397				91	95	12	47.1
67.4	400				92	97	11	47.2
67.6	401				94	98	12	47.4
67.8	404				96	100	13	47.6
68	406				97	102	12	47.8
68.2	408				99	104	13	47.9
68.4	409				101	105	15	48.1
68.6	412				103	108	15	48.3
68.8	414				105	110	15	48.4
69	416				107	111	14	48.6
69.2	418				108	113	12	48.8
69.4	420				110	115	10	48.9
69.6	422				111	116	8	49.1
69.8	423				112	117	13	49.3
70	425				114	119	13	49.5
70.2	427				116	121	13	49.6
70.4	429				118	123	11	49.8
70.6	432				119	124	9	50
70.8	435				120	125	9	50.2
71	436				122	127	11	50.3
71.2	438				124	129	18	50.5
71.4	439				126	132	22	50.7
71.6	441				129	135	12	50.8
71.8	443				131	136	11	51
72	446				132	138	15	51.2
72.2	450				135	140	17	51.4
72.4	453				137	142	13	51.5
72.6	455				138	144	11	51.7
72.8	457				140	146	16	51.9
73	458				143	148	13	52.1
73.2	461				144	150	11	52.2
73.4	462				146	151	11	52.4
73.6	465				148	153	12	52.6
73.8	467				150	155	14	52.8
74	468				152	157	16	52.9
74.2	470				154	160	17	53.1
74.4	472				157	162	18	53.3
74.6	474				160	165	19	53.5
74.8	476				163	168	16	53.7
75	478				165	170	13	53.8
75.2	481				167	172	11	54
75.4	483				168	173	10	54.2
75.6	485				170	175	12	54.3
75.8	487				172	177	17	54.5
76	488				175	180	14	54.7
76.2	490				176	181	10	54.9
76.4	491				178	183	12	55.1
76.6	493				180	185	12	55.2
76.8	495				182	187	10	55.4
77	497				184	189	11	55.6
77.2	499				186	190	11	55.8
77.4	500				188	192	13	55.9
77.6	502				190	195	12	56.1
77.8	504				192	197	12	56.3
78	506				194	199	13	56.5
78.2	508				196	201	16	56.6
78.4	510				199	204	16	56.8
78.6	511				202	207	16	57
78.8	513				204	209	13	57.2
79	515				207	211	13	57.3
79.2	516				209	213	10	57.5
79.4	518				211	215	11	57.7
79.6	520				213	217	13	57.9
79.8	522				215	220	14	58.1
80	524				218	223	18	58.2
80.2	526				221	226	13	58.4
80.4	528				223	228	11	58.6
80.6	530				225	230	10	58.8
80.8	532				227	232	12	58.9
81	533				230	234	14	59.1
81.2	536				233	237	16	59.3
81.4	538				237	241	22	59.5
81.6	540				240	244	13	59.7
81.8	543				242	246	13	59.8
82	544				245	249	16	60
82.2	547				248	252	15	60.2
82.4	550				252	256	18	60.4
82.6	552				254	258	9	60.5
82.8	554				256	259	8	60.7
83	556				257	261	10	60.9
83.2	558				260	263	11	61.1
83.4	560				262	266	11	61.2
83.6	562				264	268	11	61.4
83.8	563				267	270	10	61.6
84	565				268	272	9	61.8
84.2	567				270	274	8	61.9
84.4	568				272	275	7	62.1
84.6	570				273	277	9	62.3
84.8	572				276	279	10	62.5
85	575				278	281	12	62.7
85.2	576				281	284	11	62.8
85.4	578				283	286	10	63
85.6	581				285	288	11	63.2
85.8	582				288	291	10	63.4
86	583				290	293	8	63.5
86.2	585				292	295	9	63.7
86.4	587				294	297	7	63.9
86.6	590				296	299	9	64.1
86.8	593				298	301	10	64.3
87	594				301	304	9	64.4
87.2	597				303	306	7	64.6
87.4	600				305	307	8	64.8
87.6	602				307	309	8	65
87.8	604				309	312	7	65.1
88	606				310	313	7	65.3
88.2	608				313	315	9	65.5
88.4	610				315	318	9	65.7
88.6	612				318	320	9	65.9
88.8	614				320	323	10	66
89	616				323	326	10	66.2
89.2	617				326	328	10	66.4
89.4	619				328	331	8	66.6
89.6	622				331	333	8	66.7
89.8	624				333	335	8	66.9
90	627				335	338	7	67.1
90.2	628				337	340	6	67.3
90.4	630				339	341	7	67.5
90.6	632				341	343	7	67.6
90.8	634				343	346	8	67.8
91	636				346	348	7	68
91.2	639				347	350	6	68.2
91.4	641				349	351	6	68.4
91.6	644				351	353	6	68.5
91.8	647				353	355	7	68.7
92	650				355	357	7	68.9
92.2	652				358	360	7	69.1
92.4	654				360	362	7	69.2
92.6	656				362	364	6	69.4
92.8	658				364	366	7	69.6
93	661				367	369	7	69.8
93.2	664				369	371	8	70
93.4	666				372	374	8	70.1
93.6	667				375	376	7	70.3
93.8	670				377	379	8	70.5
94	673				380	382	8	70.7
94.2	675				383	384	7	70.8
94.4	678				385	386	7	71
94.6	681				387	389	7	71.2
94.8	683				390	391	7	71.4
95	686				392	393	7	71.6
95.2	689				394	396	6	71.7
95.4	692				397	398	7	71.9
95.6	694				399	401	6	72.1
95.8	697				402	403	8	72.3
96	699				405	406	7	72.5
96.2	701				407	408	5	72.6
96.4	704				409	410	5	72.8
96.6	706				411	412	6	73
96.8	708				413	414	7	73.2
97	711				416	417	8	73.4
97.2	714				419	420	8	73.5
97.4	718				422	423	8	73.7
97.6	721				425	426	6	73.9
97.8	724				427	428	7	74.1
98	726				430	431	8	74.2
98.2	728				433	433	5	74.4
98.4	730				435	435	5	74.6
98.6	731				437	437	6	74.8
98.8	732				439	440	7	75
99	735				442	443	7	75.1
99.2	737				445	445	7	75.3
99.4	739				448	448	7	75.5
99.6	741				450	450	6	75.7
99.8	743				452	453	7	75.8
100	745				455	455	5	76
100.2	747				457	457	6	76.2
100.4	750				459	460	8	76.4
100.6	752				462	463	7	76.6
100.8	755				465	465	6	76.7
101	757				467	467	6	76.9
101.2	759				469	469	6	77.1
101.4	761				472	472	6	77.3
101.6	763				474	474	6	77.5
101.8	765				477	476	5	77.6
102	768				478	478	5	77.8
102.2	770				481	480	7	78
102.4	772				483	483	7	78.2
102.6	775				486	486	7	78.3
102.8	778				489	488	6	78.5
103	780				491	490	4	78.7
103.2	781				492	492	6	78.9
103.4	783				495	494	7	79
103.6	785				497	497	7	79.2
103.8	787				500	499	7	79.4
104	789				502	502	6	79.6
104.2	791				504	504	6	79.7
104.4	794				507	506	7	79.9
104.6	795				509	508	6	80.1
104.8	797				511	510	7	80.3
105	800				514	513	7	80.4
105.2	802				516	515	7	80.6
105.4	803				519	518	7	80.8
105.6	805				521	520	6	81
105.8	807				523	522	7	81.2
106	809				525	524	7	81.3
106.2	811				528	526	7	81.5
106.4	813				530	529	8	81.7
106.6	815				533	532	7	81.9
106.8	817				535	534	5	82
107	820				537	536	6	82.2
107.2	822				539	538	6	82.4
107.4	824				541	540	6	82.6
107.6	827				544	542	6	82.8
107.8	830				546	545	7	82.9
108	833				549	547	6	83.1
108.2	836				551	549	5	83.3
108.4	838				552	551	5	83.5
108.6	839				554	553	5	83.7
108.8	842				556	554	5	83.8
109	844				559	557	7	84
109.2	847				562	560	7	84.2
109.4	850				564	562	9	84.4
109.6	853				568	566	9	84.6
109.8	855				571	569	6	84.7
110	858				573	571	6	84.9
110.2	860				576	574	9	85.1
110.4	862				580	578	9	85.3
110.6	865				583	581	8	85.5
110.8	868				587	584	7	85.6
111	870				589	587	6	85.8
111.2	872				591	589	5	86
111.4	875				593	591	6	86.2
111.6	878				596	593	7	86.4
111.8	880				598	596	6	86.6
112	883				601	598	7	86.7
112.2	885				604	601	9	86.9
112.4	886				608	605	7	87.1
112.6	889				611	608	7	87.3
112.8	892				613	610	6	87.5
113	895				616	613	8	87.6
113.2	898				619	616	6	87.8
113.4	901				621	618	5	88
113.6	903				623	620	4	88.2
113.8	905				624	621	4	88.4
114	909				627	623	6	88.5
114.2	912				629	626	7	88.7
114.4	914				632	629	6	88.9
114.6	916				634	631	6	89.1
114.8	919				637	633	6	89.3
115	922				639	636	6	89.4
115.2	924				641	638	5	89.6
115.4	926				644	640	7	89.8
115.6	927				647	644	8	90
115.8	928				650	646	7	90.1
116	930				653	649	7	90.3
116.2	933				656	652	6	90.5
116.4	936				658	654	7	90.7
116.6	938				661	657	7	90.9
116.8	939				663	659	5	91
117	941				665	661	5	91.2
117.2	944				667	663	5	91.4
117.4	947				669	665	5	91.6
117.6	949				671	667	7	91.8
117.8	951				674	670	6	92
118	954				676	672	6	92.1
118.2	955				679	674	6	92.3
118.4	957				681	677	7	92.5
118.6	959				684	680	6	92.7
118.8	962				686	682	6	92.9
119	965				688	684	4	93
119.2	967				690	686	6	93.2
119.4	969				693	688	6	93.4
119.6	973				695	690	6	93.6
119.8	975				697	693	7	93.8
120	978				700	696	6	93.9
120.2	980				703	698	6	94.1
120.4	982				705	700	4	94.3
120.6	985				706	702	4	94.5
120.8	988				708	704	6	94.7
121	992				711	707	7	94.8
121.2	995				714	709	6	95
121.4	998				716	711	6	95.2
121.6	1001				718	714	7	95.4
121.8	1004				721	717	7	95.6
122	1006				724	720	7	95.7
122.2	1008				727	723	7	95.9
122.4	1011				730	725	6	96.1
122.6	1014				732	727	6	96.3
122.8	1017				734	730	6	96.5
123	1019				737	732	7	96.6
123.2	1022				739	735	7	96.8
123.4	1025				742	738	7	97
123.6	1027				745	740	7	97.2
123.8	1030				747	743	5	97.4
124	1032				750	745	8	97.5
124.2	1033				753	748	8	97.7
124.4	1036				756	751	8	97.9
124.6	1039				759	754	7	98.1
124.8	1043				762	757	7	98.3
125	1047				764	760	7	98.4
125.2	1050				767	762	7	98.6
125.4	1053				769	765	7	98.8
125.6	1055				772	767	7	99
125.8	1058				774	770	8	99.1
126	1061				777	772	7	99.3
126.2	1064				779	775	8	99.5
126.4	1069				783	778	9	99.7
126.6	1073				785	780	6	99.9
126.8	1077				787	782	6	100
127	1080				789	784	6	100.2
127.2	1082				791	786	6	100.4
127.4	1085				793	788	6	100.6
127.6	1088				795	790	6	100.8
127.8	1092				797	792	6	100.9
128	1095				799	794	7	101.1
128.2	1099				801	796	7	101.3
128.4	1102				803	798	7	101.5
128.6	1106				805	800	7	101.7
128.8	1110				807	802	6	101.8
129	1114				809	804	6	102
129.2	1116				811	807	8	102.2
129.4	1119				814	809	7	102.4
129.6	1122				816	812	8	102.6
129.8	1124				819	814	8	102.7
130	1126				822	817	7	102.9
130.2	1127				824	820	8	103.1
130.4	1130				827	822	8	103.3
130.6	1133				830	825	8	103.5
130.8	1136				832	827	7	103.6
131	1139				835	830	9	103.8
131.2	1142				839	834	9	104
131.4	1144				841	837	7	104.2
131.6	1146				844	839	7	104.3
131.8	1149				846	841	7	104.5
132	1152				848	844	6	104.7
132.2	1153				850	846	6	104.9
132.4	1155				852	847	6	105
132.6	1159				854	849	7	105.2
132.8	1161				857	852	7	105.4
133	1165				859	854	6	105.6
133.2	1168				861	856	7	105.8
133.4	1172				864	859	7	106
133.6	1175				866	862	7	106.1
133.8	1178				869	864	7	106.3
134	1180				871	866	6	106.5
134.2	1184				873	868	6	106.7
134.4	1186				875	870	7	106.9
134.6	1188				878	873	7	107
134.8	1191				880	876	6	107.2
135	1195				882	878	6	107.4
135.2	1197				885	880	7	107.6
135.4	1200				887	883	7	107.8
135.6	1205				890	885	8	107.9
135.8	1209				893	889	8	108.1
136	1212				896	891	7	108.3
136.2	1215				898	893	6	108.5
136.4	1217				900	896	7	108.7
136.6	1220				903	899	9	108.8
136.8	1222				907	902	7	109
137	1224				909	904	7	109.2
137.2	1226				911	907	8	109.4
137.4	1230				914	909	7	109.6
137.6	1233				917	912	7	109.7
137.8	1236				919	915	7	109.9
138	1238				922	917	8	110.1
138.2	1241				925	920	8	110.3
138.4	1245				928	923	7	110.5
138.6	1248				930	926	7	110.6
138.8	1251				933	928	8	110.8
139	1253				936	932	8	111
139.2	1256				939	934	7	111.2
139.4	1259				942	937	8	111.4
139.6	1261				946	941	9	111.5
139.8	1263				949	944	9	111.7
140	1265				952	947	7	111.9
140.2	1269				955	950	8	112.1
140.4	1271				958	953	10	112.3
140.6	1273				962	957	8	112.4
140.8	1276				964	959	7	112.6
141	1279				967	962	8	112.8
141.2	1282				970	965	7	113
141.4	1285				972	967	7	113.2
141.6	1288				975	970	8	113.4
141.8	1292				978	973	7	113.5
142	1293				980	975	8	113.7
142.2	1296				983	978	8	113.9
142.4	1298				985	980	8	114.1
142.6	1301				988	983	8	114.3
142.8	1304				991	986	7	114.4
143	1307				993	988	7	114.6
143.2	1310				995	990	8	114.8
143.4	1312				998	993	8	115
143.6	1314				1000	995	8	115.1
143.8	1317				1003	998	8	115.3
144	1320				1005	1000	8	115.5
144.2	1322				1008	1003	8	115.7
144.4	1325				1011	1006	8	115.8
144.6	1327				1013	1008	8	116
144.8	1330				1016	1011	10	116.2
145	1332				1020	1015	10	116.3
145.2	1334	1334	1329	19	1023	1018	9	116.5
145.4	1337	1337	1332	20	1026	1021	8	116.6
145.6	1341	1340	1335	20	1027	1022	8	116.8
145.8	1345	1343	1338	20	1031	1026	9	117
146	1348	1346	1341	20	1033	1028	8	117.2
146.2	1352	1348	1343	20	1035	1030	8	117.3
146.4	1355	1350	1345	20	1038	1033	8	117.5
146.6	1358	1352	1347	20	1040	1035	8	117.7
146.8	1361	1355	1349	20	1043	1038	8	117.9
147	1365	1357	1351	20	1046	1041	10	118.1
147.2	1368	1360	1354	20	1049	1044	12	118.2
147.4	1371	1363	1357	20	1053	1048	9	118.4
147.6	1375	1366	1359	20	1056	1051	9	118.6
147.8	1376	1369	1363	20	1058	1053	9	118.8
148	1378	1373	1366	20	1061	1056	9	119
148.2	1381	1376	1370	21	1064	1059	9	119.1
148.4	1384	1379	1373	21	1067	1062	9	119.3
148.6	1387	1383	1376	21	1069	1064	9	119.5
148.8	1389	1386	1379	21	1072	1067	8	119.7
149	1392	1389	1382	21	1074	1069	8	119.9
149.2	1393	1391	1384	21	1076	1071	10	120.1
149.4	1396	1394	1387	21	1080	1074	10	120.2
149.6	1400	1397	1390	21	1082	1077	8	120.4
149.8		1400	1393	21	1084	1079	9	120.6
150		1403	1397	21	1087	1082	9	120.8
150.2		1407	1400	21	1089	1084	9	121
150.4		1411	1404	22	1092	1087	11	121.1
150.6		1413	1406	22	1096	1091	12	121.3
150.8		1417	1410	22	1100	1095	10	121.5
151		1420	1412	22	1103	1098	9	121.7
151.2		1423	1415	22	1105	1100	8	121.9
151.4		1425	1417	22	1108	1103	8	122
151.6		1428	1420	22	1110	1105	9	122.2
151.8		1431	1423	22	1113	1108	8	122.4
152		1433	1426	22	1115	1110	8	122.6
152.2		1436	1429	22	1117	1112	9	122.7
152.4		1438	1431	22	1120	1115	10	122.9
152.6		1441	1433	23	1123	1118	10	123.1
152.8		1443	1436	23	1126	1121	9	123.3
153		1446	1438	23	1129	1124	8	123.5
153.2		1448	1440	23	1131	1126	8	123.7
153.4		1450	1442	23	1133	1128	9	123.8
153.6		1454	1445	23	1136	1131	9	124
153.8		1457	1448	23	1139	1133	9	124.2
154		1459	1450	23	1141	1136	9	124.4
154.2		1462	1453	23	1144	1139	9	124.6
154.4		1464	1456	23	1147	1142	10	124.7
154.6		1467	1460	24	1150	1145	9	124.9
154.8		1470	1463	24	1153	1148	9	125.1
155		1472	1465	24	1155	1150	9	125.3
155.2		1475	1468	24	1158	1153	9	125.5
155.4		1477	1470	24	1160	1155	9	125.6
155.6		1480	1473	24	1163	1158	9	125.8
155.8		1483	1476	24	1166	1161	9	126
156		1486	1479	24	1169	1164	10	126.2
156.2		1489	1483	24	1172	1167	11	126.4
156.4		1492	1487	24	1176	1171	11	126.5
156.6		1495	1491	25	1179	1174	11	126.7
156.8		1498	1494	25	1182	1177	11	126.9
157		1501	1497	25	1186	1181	12	127.1
157.2		1504	1500	25	1190	1184	12	127.3
157.4		1507	1504	25	1193	1188	11	127.4
157.6		1510	1507	25	1196	1191	10	127.6
157.8		1513	1510	25	1199	1194	10	127.8
158		1516	1514	25	1202	1197	11	128
158.2		1520	1517	25	1205	1200	11	128.2
158.4		1523	1521	26	1208	1203	11	128.4
158.6		1526	1524	26	1211	1206	11	128.5
158.8		1529	1526	26	1214	1209	10	128.7
159		1532	1529	26	1217	1212	11	128.9
159.2		1535	1532	26	1220	1215	11	129.1
159.4		1538	1534	26	1223	1218	11	129.3
159.6		1541	1537	26	1226	1221	11	129.4
159.8		1544	1540	26	1229	1224	11	129.6
160		1547	1543	27	1231	1226	11	129.8
160.2		1550	1547	27	1234	1229	11	130
160.4		1553	1549	27	1237	1232	12	130.2
160.6		1555	1552	27	1240	1235	13	130.3
160.8		1558	1555	27	1244	1239	13	130.5
161		1561	1557	27	1247	1242	13	130.7
161.2		1564	1559	27	1250	1245	12	130.9
161.4		1566	1562	27	1253	1247	12	131.1
161.6		1569	1564	27	1256	1250	12	131.3
161.8		1572	1566	28	1259	1254	12	131.4
162		1574	1569	28	1262	1258	13	131.6
162.2		1577	1571	28	1265	1262	14	131.8
162.4		1579	1574	28	1268	1265	14	132
162.6		1582	1577	28	1272	1268	15	132.2
162.8		1586	1581	28	1275	1272	14	132.3
163		1591	1585	28	1278	1275	14	132.5
163.2		1595	1589	29	1281	1279	14	132.7
163.4		1600	1593	29	1284	1282	14	132.9
163.6		1603	1597	29	1287	1284	14	133.1
163.8		1607	1600	29	1290	1287	15	133.2
164		1610	1604	29	1293	1290	16	133.4
164.2		1613	1607	29	1297	1293	17	133.6
164.4		1617	1611	30	1301	1297	18	133.8
164.6		1621	1615	30	1304	1300	17	134
164.8		1624	1618	30	1308	1304	17	134.1
165		1628	1622	30	1311	1308	17	134.3
165.2		1632	1625	30	1314	1311	16	134.5
165.4		1636	1628	31	1317	1313	15	134.7
165.6		1639	1632	31	1320	1316	17	134.9
165.8		1643	1636	31	1323	1319	22	135.1
166		1646	1640	31	1328	1323	23	135.2
166.2		1650	1644	31	1332	1327	23	135.4
166.4		1653	1646	32	1336	1331	18	135.6
166.6		1656	1649	32	1339	1334	17	135.8
166.8		1659	1652	32	1342	1337	16	136
167		1661	1654	32	1345	1340	17	136.1
167.2		1665	1658	32	1347	1342	16	136.3
167.4		1669	1662	33	1350	1345	16	136.5
167.6		1673	1666	33	1352	1347	16	136.7
167.8		1677	1670	33	1354	1349	16	136.9
168		1681	1674	33	1357	1351	18	137.1
168.2		1686	1679	33	1360	1354	22	137.2
168.4		1690	1683	34	1364	1357	20	137.4
168.6		1693	1686	34	1366	1360	20	137.6
168.8		1696	1689	34	1370	1363	23	137.8
169		1699	1691	34	1373	1367	21	138
169.2		1701	1694	34	1377	1371	22	138.1
169.4		1704	1697	35	1380	1374	26	138.3
169.6		1706	1699	35	1384	1377	22	138.5
169.8		1708	1702	35	1387	1380	21	138.7
170		1710	1704	35	1390	1383	21	138.9
170.2		1713	1706	35	1393	1386	22	139
170.4		1715	1708	35	1396	1389	23	139.2
170.6		1718	1711	35	1399	1392	22	139.4
170.8		1722	1714	36	1402	1396	24	139.6
171		1725	1717	36	1406	1399	26	139.8
171.2		1728	1720	36	1410	1403	26	140
171.4		1730	1723	36	1413	1406	24	140.1
171.6		1733	1726	36	1417	1410	27	140.3
171.8		1737	1729	37	1420	1412	23	140.5
172		1740	1732	37	1423	1415	23	140.7
172.2		1742	1734	37	1425	1417	23	140.9
172.4		1745	1737	37	1428	1420	24	141
172.6		1749	1741	37	1431	1423	24	141.2
172.8		1752	1743	38	1434	1427	23	141.4
173		1754	1746	38	1436	1429	21	141.6
173.2		1757	1749	38	1439	1432	24	141.8
173.4		1762	1753	38	1442	1434	24	141.9
173.6		1766	1757	39	1444	1437	22	142.1
173.8		1769	1761	39	1447	1439	22	142.3
174		1772	1764	39	1449	1441	24	142.5
174.2		1776	1767	39	1452	1444	28	142.7
174.4		1779	1770	39	1455	1447	27	142.8
174.6		1782	1772	40	1458	1450	25	143
174.8		1785	1775	40	1461	1452	25	143.2
175		1788	1778	40	1464	1456	26	143.4
175.2		1791	1781	40	1466	1459	26	143.6
175.4		1794	1784	41	1469	1462	26	143.7
175.6		1796	1787	41	1472	1465	25	143.9
175.8		1799	1790	41	1474	1467	25	144.1
176		1802	1793	41	1477	1470	26	144.3
176.2		1806	1796	41	1480	1473	28	144.5
176.4		1809	1798	42	1483	1476	28	144.7
176.6		1811	1801	42	1486	1480	30	144.8
176.8		1815	1804	42	1489	1484	31	145
177		1818	1807	42	1493	1488	30	145.2
177.2		1821	1810	43	1496	1491	30	145.4
177.4		1825	1814	43	1499	1495	31	145.5
177.6		1828	1818	43	1502	1498	31	145.7
177.8		1832	1822	44	1505	1501	31	145.9
178		1835	1826	44	1508	1505	31	146.1
178.2		1838	1829	44	1512	1508	32	146.3
178.4		1842	1833	44	1515	1512	32	146.5
178.6		1844	1836	45	1518	1515	32	146.6
178.8		1847	1839	45	1521	1519	32	146.8
179		1850	1842	45	1524	1522	33	147
179.2		1853	1845	45	1528	1525	33	147.2
179.4		1855	1848	45	1531	1528	33	147.4
179.6		1857	1851	46	1534	1531	34	147.5
179.8		1860	1854	46	1537	1534	34	147.7
180		1862	1856	46	1541	1537	34	147.9
180.2		1865	1859	46	1544	1540	34	148.1
180.4		1868	1862	47	1547	1543	35	148.3
180.6		1871	1864	47	1550	1547	33	148.4
180.8		1874	1867	47	1553	1549	31	148.6
181		1877	1870	47	1555	1552	33	148.8
181.2		1879	1873	47	1559	1555	33	149
181.4		1882	1876	48	1561	1557	32	149.2
181.6		1885	1879	48	1564	1559	34	149.4
181.8		1888	1883	48	1567	1562	33	149.5
182		1892	1887	49	1570	1565	34	149.7
182.2		1896	1891	49	1573	1567	33	149.9
182.4		1899	1894	49	1575	1569	33	150.1
182.6		1902	1896	50	1578	1572	34	150.3
182.8		1905	1899	50	1581	1575	36	150.4
183		1909	1904	50	1584	1579	44	150.6
183.2		1913	1908	50	1589	1583	53	150.8
183.4		1916	1912	51	1594	1588	50	151
183.6		1919	1915	51	1598	1592	48	151.2
183.8		1922	1918	51	1602	1596	45	151.4
184		1926	1921	52	1606	1599	44	151.5
184.2		1928	1923	52	1610	1603	40	151.7
184.4		1930	1926	52	1613	1607	42	151.9
184.6		1933	1929	52	1617	1611	47	152.1
184.8		1936	1932	53	1621	1615	43	152.3
185		1940	1937	53	1624	1618	45	152.4
185.2		1943	1940	53	1629	1622	48	152.6
185.4		1947	1944	54	1633	1625	45	152.8
185.6		1951	1948	54	1636	1629	45	153
185.8		1955	1952	54	1640	1633	48	153.2
186		1958	1955	55	1644	1637	47	153.3
186.2		1960	1957	55	1648	1641	47	153.5
186.4		1963	1960	55	1651	1645	41	153.7
186.6		1966	1964	56	1654	1647	43	153.9
186.8		1969	1968	56	1657	1650	42	154.1
187		1972	1971	56	1660	1653	40	154.2
187.2		1975	1974	56	1663	1656	49	154.4
187.4		1978	1977	57	1668	1660	52	154.6
187.6		1982	1981	57	1672	1665	50	154.8
187.8		1985	1984	57	1676	1669	54	155
188		1989	1988	58	1680	1674	56	155.2
188.2		1994	1993	58	1685	1678	59	155.3
188.4		1998	1997	59	1689	1682	52	155.5
188.6		2001	2000	59	1693	1686	48	155.7
188.8		2004	2003	59	1696	1689	45	155.9
189		2008	2007	60	1699	1692	42	156.1
189.2		2012	2010	60	1702	1694	41	156.2
189.4		2014	2013	60	1704	1697	41	156.4
189.6		2017	2015	61	1706	1700	42	156.6
189.8		2020	2018	61	1709	1702	42	156.8
190		2022	2019	61	1711	1705	42	157
190.2		2024	2021	61	1714	1707	44	157.1
190.4		2027	2025	62	1717	1710	49	157.3
190.6		2030	2028	62	1720	1713	50	157.5
190.8		2034	2032	62	1724	1716	51	157.7
191		2036	2036	63	1727	1719	47	157.9
191.2		2040	2040	63	1730	1722	47	158.1
191.4		2043	2043	63	1733	1726	50	158.2
191.6		2046	2047	64	1737	1729	51	158.4
191.8		2050	2051	64	1740	1732	47	158.6
192		2053	2054	64	1742	1735	48	158.8
192.2		2055	2057	65	1746	1738	57	159
192.4		2058	2060	65	1750	1742	52	159.1
192.6		2061	2063	65	1753	1744	48	159.3
192.8		2064	2066	66	1756	1747	52	159.5
193		2067	2069	66	1760	1751	67	159.7
193.2		2070	2072	66	1764	1756	56	159.9
193.4		2074	2076	67	1768	1760	55	160
193.6		2077	2079	67	1771	1763	57	160.2
193.8		2080	2082	67	1775	1766	56	160.4
194		2084	2086	68	1778	1769	53	160.6
194.2		2087	2090	68	1781	1772	54	160.8
194.4		2090	2093	68	1785	1775	55	160.9
194.6		2095	2097	69	1788	1778	56	161.1
194.8		2099	2101	69	1792	1782	54	161.3
195		2102	2103	70	1794	1785	52	161.5
195.2		2104	2106	70	1797	1788	52	161.7
195.4		2108	2109	70	1800	1791	58	161.9
195.6		2111	2112	71	1804	1794	58	162
195.8		2113	2115	71	1807	1797	56	162.2
196		2116	2118	71	1810	1800	56	162.4
196.2		2120	2122	72	1814	1803	59	162.6
196.4		2124	2126	72	1817	1806	61	162.8
196.6		2128	2129	72	1821	1810	61	162.9
196.8		2130	2131	73	1825	1814	62	163.1
197		2132	2132	73	1829	1819	62	163.3
197.2		2135	2135	73	1832	1823	62	163.5
197.4		2138	2138	73	1836	1826	60	163.7
197.6		2141	2141	74	1840	1830	69	163.8
197.8		2145	2144	74	1843	1834	54	164
198		2148	2148	75	1846	1837	57	164.2
198.2		2151	2151	75	1849	1841	57	164.4
198.4		2154	2154	75	1852	1844	58	164.6
198.6		2158	2157	76	1855	1848	55	164.8
198.8		2161	2160	76	1857	1851	56	164.9
199		2164	2163	76	1860	1854	58	165.1
199.2		2167	2166	77	1863	1856	58	165.3
199.4		2171	2169	77	1866	1859	60	165.5
199.6		2174	2172	77	1869	1862	60	165.7
199.8		2177	2177	78	1872	1865	62	165.8
200		2181	2180	78	1875	1868	62	166
200.2		2183	2183	78	1878	1871	56	166.2
200.4		2186	2186	79	1880	1874	61	166.4
200.6		2189	2188	79	1884	1878	64	166.6
200.8		2192	2191	79	1887	1882	72	166.7
201		2195	2194	80	1892	1887	73	166.9
201.2		2198	2197	80	1896	1891	68	167.1
201.4		2202	2201	80	1899	1894	64	167.3
201.6		2205	2204	81	1902	1897	64	167.5
201.8		2208	2207	81	1906	1900	70	167.6
202		2211	2211	81	1910	1905	73	167.8
202.2		2215	2214	82	1914	1910	72	168
202.4		2217	2216	82	1917	1913	62	168.2
202.6		2220	2219	82	1920	1916	72	168.4
202.8		2223	2222	83	1924	1920	69	168.5
203		2226	2224	83	1927	1923	60	168.7
203.2		2229	2227	83	1929	1925	64	168.9
203.4		2232	2230	83	1933	1928	70	169.1
203.6		2235	2233	84	1936	1932	73	169.3
203.8		2238	2236	84	1940	1937	73	169.4
204		2242	2240	85	1944	1941	75	169.6
204.2		2245	2243	85	1948	1945	76	169.8
204.4		2248	2246	85	1952	1949	79	170
204.6		2252	2249	86	1956	1953	71	170.2
204.8		2255	2252	86	1959	1956	66	170.3
205		2258	2255	86	1962	1959	67	170.5
205.2		2261	2258	87	1965	1963	73	170.7
205.4		2265	2262	87	1968	1967	70	170.9
205.6		2268	2265	87	1972	1971	72	171.1
205.8		2272	2269	88	1975	1974	75	171.3
206		2276	2273	88	1979	1978	75	171.4
206.2		2279	2275	88	1982	1981	78	171.6
206.4		2281	2278	89	1986	1985	80	171.8
206.6		2284	2281	89	1991	1989	92	172
206.8		2287	2283	89	1996	1995	81	172.2
207		2290	2286	90	1999	1998	71	172.3
207.2		2292	2288	90	2003	2002	81	172.5
207.4		2295	2290	90	2007	2006	82	172.7
207.6		2299	2294	90	2011	2009	78	172.9
207.8		2302	2298	91	2014	2012	75	173.1
208		2305	2301	91	2017	2015	74	173.2
208.2		2309	2304	91	2020	2018	70	173.4
208.4		2311	2307	92	2022	2020	69	173.6
208.6		2314	2309	92	2024	2022	75	173.8
208.8		2318	2312	92	2028	2026	79	174
209		2322	2316	93	2031	2030	82	174.1
209.2		2326	2320	93	2035	2034	77	174.3
209.4		2329	2323	93	2038	2038	84	174.5
209.6		2332	2326	94	2042	2042	78	174.7
209.8		2335	2329	94	2045	2046	82	174.9
210		2338	2332	94	2049	2050	81	175
210.2		2342	2335	95	2052	2054	77	175.2
210.4		2346	2339	95	2055	2057	76	175.4
210.6		2349	2341	95	2058	2060	80	175.6
210.8		2352	2344	96	2061	2064	80	175.8
211		2356	2348	96	2065	2067	79	176
211.2		2360	2353	96	2068	2070	82	176.1
211.4		2363	2356	97	2072	2073	92	176.3
211.6		2367	2360	97	2076	2077	80	176.5
211.8		2370	2363	97	2079	2080	82	176.7
212		2373	2366	98	2082	2084	88	176.8
212.2		2376	2369	98	2086	2089	88	177
212.4		2379	2372	98	2090	2092	85	177.2
212.6		2384	2376	99	2094	2097	94	177.4
212.8		2387	2380	99	2099	2101	88	177.6
213		2391	2384	99	2102	2104	82	177.8
213.2		2394	2387	99	2105	2107	87	177.9
213.4		2398	2391	100	2109	2110	86	178.1
213.6		2401	2394	100	2112	2113	81	178.3
213.8		2404	2397	100	2115	2117	85	178.5
214		2406	2399	101	2118	2120	93	178.7
214.2		2410	2403	101	2123	2124	94	178.8
214.4		2413	2405	101	2126	2128	87	179
214.6		2416	2408	102	2129	2130	81	179.2
214.8		2420	2412	102	2132	2132	82	179.4
215		2423	2415	102	2134	2135	87	179.6
215.2		2426	2419	102	2138	2138	89	179.8
215.4		2429	2422	103	2141	2141	90	179.9
215.6		2432	2424	103	2145	2145	91	180.1
215.8		2434	2427	103	2149	2149	91	180.3
216		2438	2430	103	2152	2152	90	180.5
216.2		2441	2433	104	2156	2155	91	180.7
216.4		2444	2436	104	2159	2158	89	180.8
216.6		2447	2439	104	2163	2162	92	181
216.8		2450	2441	105	2166	2165	93	181.2
217		2454	2446	105	2170	2168	92	181.4
217.2		2457	2449	105	2173	2172	92	181.6
217.4		2460	2452	105	2177	2176	95	181.7
217.6		2463	2455	106	2181	2180	91	181.9
217.8		2467	2458	106	2183	2183	90	182.1
218		2470	2461	106	2187	2186	92	182.3
218.2		2473	2464	106	2190	2189	90	182.5
218.4		2477	2468	107	2193	2192	95	182.6
218.6		2480	2470	107	2196	2195	94	182.8
218.8		2483	2475	107	2200	2199	95	183
219		2487	2479	108	2203	2202	94	183.2
219.2		2491	2483	108	2207	2206	95	183.4
219.4		2494	2486	108	2210	2210	97	183.5
219.6		2498	2490	108	2214	2213	95	183.7
219.8		2501	2493	109	2217	2216	92	183.9
220		2504	2495	109	2220	2219	94	184.1
220.2		2508	2499	109	2223	2222	95	184.3
220.4		2510	2501	109	2226	2224	95	184.4
220.6		2513	2504	110	2229	2227	95	184.6
220.8		2516	2508	110	2233	2230	96	184.8
221		2519	2511	110	2236	2234	96	185
221.2		2522	2514	110	2239	2238	98	185.2
221.4		2525	2517	110	2243	2241	99	185.4
221.6		2529	2521	111	2247	2245	99	185.5
221.8		2533	2525	111	2250	2248	101	185.7
222		2537	2529	111	2254	2251	97	185.9
222.2		2541	2532	111	2257	2254	98	186.1
222.4		2544	2536	112	2260	2257	101	186.3
222.6		2550	2542	112	2265	2262	104	186.4
222.8		2554	2546	112	2268	2265	101	186.6
223		2557	2549	113	2272	2269	103	186.8
223.2		2560	2551	113	2276	2273	100	187
223.4		2564	2555	113	2279	2276	97	187.2
223.6		2567	2558	113	2282	2279	101	187.3
223.8		2570	2561	113	2285	2282	98	187.5
224		2573	2564	114	2288	2284	99	187.7
224.2		2577	2568	114	2291	2287	97	187.9
224.4		2580	2571	114	2294	2289	99	188.1
224.6		2584	2575	114	2298	2293	105	188.3
224.8		2589	2579	115	2301	2297	102	188.4
225		2593	2583	115	2305	2301	102	188.6
225.2		2596	2586	115	2308	2304	102	188.8
225.4		2600	2590	115	2311	2307	101	189
225.6		2605	2595	116	2315	2309	103	189.2
225.8		2609	2600	116	2319	2313	110	189.3
226		2613	2603	116	2323	2317	110	189.5
226.2		2617	2607	116	2327	2321	104	189.7
226.4		2620	2609	117	2331	2324	103	189.9
226.6		2624	2613	117	2334	2327	102	190.1
226.8		2628	2617	117	2337	2331	105	190.3
227		2631	2620	117	2341	2334	108	190.4
227.2		2635	2624	117	2345	2338	111	190.6
227.4		2641	2630	118	2349	2341	103	190.8
227.6		2646	2635	118	2352	2344	106	191
227.8		2650	2638	118	2356	2347	111	191.2
228		2653	2641	118	2361	2353	110	191.3
228.2		2656	2645	119	2364	2356	106	191.5
228.4		2660	2647	119	2367	2360	107	191.7
228.6		2663	2650	119	2371	2364	108	191.9
228.8		2666	2654	119	2374	2367	106	192.1
229		2671	2659	119	2377	2370	106	192.2
229.2		2674	2662	119	2381	2374	116	192.4
229.4		2677	2665	120	2386	2378	109	192.6
229.6		2682	2669	120	2390	2382	109	192.8
229.8		2685	2672	120	2393	2386	108	193
230		2689	2676	120	2397	2391	113	193.2
230.2		2692	2679	120	2401	2394	107	193.3
230.4		2697	2684	121	2404	2397	106	193.5
230.6		2701	2689	121	2407	2399	109	193.7
230.8		2704	2692	121	2410	2403	109	193.9
231		2708	2695	121	2414	2406	109	194.1
231.2		2711	2698	121	2417	2409	110	194.2
231.4		2715	2702	121	2421	2413	110	194.4
231.6		2718	2705	121	2424	2417	110	194.6
231.8		2723	2709	122	2428	2421	110	194.8
232		2727	2714	122	2431	2423	106	195
232.2		2729	2717	122	2433	2426	109	195.1
232.4		2732	2720	122	2437	2429	111	195.3
232.6		2736	2723	122	2441	2432	111	195.5
232.8		2739	2726	122	2444	2435	110	195.7
233		2743	2730	122	2447	2439	110	195.9
233.2		2747	2734	123	2450	2442	112	196.1
233.4		2751	2737	123	2454	2446	112	196.2
233.6		2755	2741	123	2458	2450	111	196.4
233.8		2757	2744	123	2461	2453	111	196.6
234		2763	2750	123	2465	2456	113	196.8
234.2		2767	2754	123	2468	2460	112	197
234.4		2771	2758	123	2471	2463	111	197.1
234.6		2774	2760	123	2475	2466	116	197.3
234.8		2777	2763	123	2479	2470	112	197.5
235		2782	2768	124	2483	2474	115	197.7
235.2		2785	2771	124	2487	2478	116	197.9
235.4		2789	2776	124	2491	2483	115	198.1
235.6		2793	2781	124	2495	2486	115	198.2
235.8		2798	2785	124	2499	2491	114	198.4
236		2802	2789	124	2502	2494	112	198.6
236.2		2806	2792	124	2506	2497	114	198.8
236.4		2810	2796	124	2509	2500	111	198.9
236.6		2814	2800	124	2512	2503	113	199.1
236.8		2819	2805	125	2515	2507	114	199.3
237		2823	2809	125	2518	2511	113	199.5
237.2		2827	2814	125	2522	2514	115	199.7
237.4		2830	2817	125	2526	2518	116	199.9
237.6		2834	2820	125	2530	2521	117	200
237.8		2838	2824	125	2534	2525	119	200.2
238		2841	2827	125	2538	2530	115	200.4
238.2		2845	2831	125	2542	2534	117	200.6
238.4		2849	2836	125	2547	2539	125	200.8
238.6		2853	2840	125	2552	2544	120	200.9
238.8		2856	2843	125	2556	2548	116	201.1
239		2859	2846	125	2559	2551	115	201.3
239.2		2863	2849	125	2563	2554	116	201.5
239.4		2867	2853	125	2567	2557	116	201.7
239.6		2870	2856	126	2570	2561	116	201.9
239.8		2875	2861	126	2574	2565	116	202
240		2879	2865	126	2577	2569	116	202.2
240.2		2884	2871	126	2581	2572	119	202.4
240.4		2888	2874	126	2586	2577	121	202.6
240.6		2894	2880	126	2591	2581	118	202.8
240.8		2898	2884	126	2595	2585	118	202.9
241		2903	2888	126	2599	2589	119	203.1
241.2		2906	2892	126	2604	2593	121	203.3
241.4		2910	2896	126	2608	2599	121	203.5
241.6		2916	2903	126	2613	2603	119	203.7
241.8		2920	2906	126	2617	2607	118	203.9
242		2924	2910	126	2620	2610	119	204
242.2		2927	2913	126	2625	2614	119	204.2
242.4		2931	2916	126	2629	2618	118	204.4
242.6		2934	2920	126	2633	2621	119	204.6
242.8		2938	2924	126	2638	2627	128	204.8
243		2943	2929	126	2643	2633	123	204.9
243.2		2949	2935	126	2648	2637	121	205.1
243.4		2953	2939	126	2652	2641	118	205.3
243.6		2958	2943	126	2656	2644	118	205.5
243.8		2961	2946	126	2659	2647	118	205.7
244		2965	2951	126	2663	2650	119	205.8
244.2		2970	2956	126	2667	2655	120	206
244.4		2974	2960	126	2671	2660	119	206.2
244.6		2977	2964	126	2675	2663	118	206.4
244.8		2981	2968	126	2679	2667	121	206.6
245		2985	2972	126	2683	2671	119	206.8
245.2		2989	2976	126	2687	2674	119	206.9
245.4		2994	2980	126	2691	2678	120	207.1
245.6		2997	2984	126	2696	2683	122	207.3
245.8		3000	2988	126	2701	2688	120	207.5
246		3005	2993	126	2704	2692	119	207.7
246.2		3009	2996	126	2708	2696	119	207.8
246.4		3013	3000	126	2711	2699	119	208
246.6		3018	3005	126	2715	2702	120	208.2
246.8		3023	3009	126	2720	2707	121	208.4
247		3026	3013	126	2724	2711	120	208.6
247.2		3031	3018	126	2728	2715	119	208.7
247.4		3036	3023	126	2731	2718	119	208.9
247.6		3040	3027	126	2735	2722	120	209.1
247.8		3045	3031	126	2738	2726	119	209.3
248		3049	3035	125	2742	2729	120	209.5
248.2		3054	3039	125	2747	2734	120	209.6
248.4		3059	3045	125	2751	2737	120	209.8
248.6		3063	3049	125	2755	2742	119	210
248.8		3067	3053	125	2759	2745	122	210.2
249		3072	3058	125	2764	2751	120	210.4
249.2		3079	3064	125	2769	2756	121	210.6
249.4		3083	3068	125	2772	2759	119	210.7
249.6		3088	3072	125	2776	2762	119	210.9
249.8		3091	3077	125	2780	2767	121	211.1
250		3095	3081	125	2784	2771	119	211.3
250.2		3099	3084	125	2789	2776	120	211.5
250.4		3103	3088	125	2793	2780	120	211.6
250.6		3108	3092	124	2798	2785	120	211.8
250.8		3112	3096	124	2803	2789	120	212
251		3116	3100	124	2807	2793	119	212.2
251.2		3119	3103	124	2811	2797	120	212.4
251.4		3123	3108	124	2816	2802	120	212.5
251.6		3126	3111	124	2821	2807	119	212.7
251.8		3132	3116	124	2825	2812	119	212.9
252		3137	3121	124	2829	2816	119	213.1
252.2		3142	3125	124	2833	2819	119	213.3
252.4		3145	3129	124	2837	2823	119	213.5
252.6		3149	3133	123	2841	2827	119	213.6
252.8		3154	3138	123	2845	2831	119	213.8
253		3158	3143	123	2850	2836	119	214
253.2		3164	3148	123	2854	2840	118	214.2
253.4		3169	3153	123	2857	2844	118	214.4
253.6		3174	3157	123	2861	2847	119	214.5
253.8		3178	3162	123	2865	2851	118	214.7
254		3182	3166	123	2869	2855	118	214.9
254.2		3187	3171	122	2874	2860	119	215.1
254.4		3192	3176	122	2879	2865	118	215.3
254.6		3197	3181	122	2884	2870	118	215.4
254.8		3202	3186	122	2888	2874	119	215.6
255		3206	3190	122	2895	2881	119	215.8
255.2		3210	3194	122	2899	2885	118	216
255.4		3214	3199	122	2904	2889	117	216.2
255.6		3218	3202	121	2908	2893	117	216.4
255.8		3222	3207	121	2913	2899	122	216.5
256		3227	3211	121	2918	2905	117	216.7
256.2		3232	3216	121	2923	2909	117	216.9
256.4		3237	3221	121	2926	2912	117	217.1
256.6		3242	3227	121	2930	2916	117	217.3
256.8		3246	3231	120	2934	2920	117	217.4
257		3249	3234	120	2938	2924	117	217.6
257.2		3253	3238	120	2944	2930	118	217.8
257.4		3257	3241	120	2950	2936	117	218
257.6		3260	3245	120	2955	2941	116	218.2
257.8		3265	3249	120	2959	2945	116	218.4
258		3269	3253	120	2964	2949	116	218.5
258.2		3274	3259	119	2969	2955	115	218.7
258.4		3279	3264	119	2973	2960	115	218.9
258.6		3284	3269	119	2977	2964	115	219.1
258.8		3289	3274	119	2981	2968	115	219.3
259		3294	3278	119	2986	2973	115	219.5
259.2		3299	3284	118	2990	2977	115	219.6
259.4		3303	3289	118	2995	2982	115	219.8
259.6		3308	3294	118	2998	2986	115	220
259.8		3313	3299	118	3003	2991	114	220.2
260		3318	3303	118	3007	2995	114	220.3
260.2		3322	3307	117	3012	2999	114	220.5
260.4		3326	3311	117	3017	3004	113	220.7
260.6		3330	3316	117	3022	3008	113	220.9
260.8		3334	3320	117	3026	3013	113	221.1
261		3339	3325	117	3031	3019	113	221.2
261.2		3344	3329	116	3037	3024	112	221.4
261.4		3348	3334	116	3041	3028	112	221.6
261.6		3353	3338	116	3047	3033	112	221.8
261.8		3358	3343	116	3052	3037	112	222
262		3363	3349	115	3057	3043	111	222.2
262.2		3370	3356	115	3062	3048	111	222.3
262.4		3375	3361	115	3066	3053	111	222.5
262.6		3382	3367	115	3072	3058	112	222.7
262.8		3386	3371	114	3079	3064	111	222.9
263		3391	3377	114	3084	3069	110	223.1
263.2		3396	3382	114	3089	3074	110	223.3
263.4		3401	3387	114	3093	3078	110	223.4
263.6		3406	3392	113	3097	3083	110	223.6
263.8		3411	3396	113	3102	3087	109	223.8
264		3415	3399	113	3106	3091	109	224
264.2		3419	3404	113	3111	3095	109	224.2
264.4		3425	3410	113	3115	3099	109	224.3
264.6		3431	3417	112	3119	3103	109	224.5
264.8		3436	3421	112	3124	3108	109	224.7
265		3440	3425	112	3127	3112	107	224.9
265.2		3445	3429	112	3133	3117	107	225.1
265.4		3450	3434	111	3139	3122	107	225.2
265.6		3455	3440	111	3143	3127	107	225.4
265.8		3460	3445	111	3147	3131	108	225.6
266		3466	3450	111	3152	3136	106	225.8
266.2		3471	3455	110	3157	3142	106	226
266.4		3475	3459	110	3163	3147	105	226.2
266.6		3481	3466	110	3168	3152	105	226.3
266.8		3487	3472	110	3174	3157	105	226.5
267		3495	3479	109	3178	3162	105	226.7
267.2		3501	3485	109	3183	3167	104	226.9
267.4		3506	3490	109	3188	3173	103	227.1
267.6		3513	3497	108	3194	3178	103	227.3
267.8		3519	3504	108	3200	3184	102	227.4
268		3524	3509	108	3205	3188	104	227.6
268.2		3529	3513	108	3209	3193	103	227.8
268.4		3534	3518	108	3214	3198	103	228
268.6		3537	3521	107	3217	3202	103	228.2
268.8		3543	3528	107	3222	3207	102	228.3
269		3549	3534	107	3227	3211	101	228.5
269.2		3555	3540	107	3233	3217	100	228.7
269.4		3560	3544	106	3238	3222	100	228.9
269.6		3565	3549	106	3243	3228	101	229.1
269.8		3570	3555	106	3247	3232	102	229.2
270		3576	3561	106	3251	3236	101	229.4
270.2		3583	3567	105	3256	3240	101	229.6
270.4		3590	3574	105	3260	3244	100	229.8
270.6		3597	3580	105	3264	3249	99	230
270.8		3603	3587	104	3269	3253	99	230.2
271		3609	3593	104	3274	3259	97	230.3
271.2		3614	3598	104	3280	3265	97	230.5
271.4		3621	3604	103	3285	3270	96	230.7
271.6		3627	3611	103	3290	3275	96	230.9
271.8		3633	3617	103	3295	3280	96	231.1
272		3637	3622	103	3301	3286	96	231.3
272.2		3643	3627	103	3306	3292	94	231.4
272.4		3649	3632	102	3312	3297	94	231.6
272.6		3655	3638	102	3317	3302	95	231.8
272.8		3660	3644	102	3321	3306	95	232
273		3666	3650	102	3326	3311	95	232.2
273.2		3671	3656	101	3331	3316	95	232.3
273.4		3676	3660	101	3335	3321	93	232.5
273.6		3682	3666	101	3340	3326	92	232.7
273.8		3687	3671	101	3345	3331	93	232.9
274		3692	3677	101	3350	3335	92	233.1
274.2		3697	3682	100	3355	3340	92	233.2
274.4		3702	3687	100	3361	3347	90	233.4
274.6		3708	3693	100	3368	3354	89	233.6
274.8		3714	3698	100	3374	3360	89	233.8
275		3721	3706	99	3381	3366	88	234
275.2		3727	3713	99	3386	3371	89	234.2
275.4		3732	3718	99	3391	3377	89	234.3
275.6		3737	3722	99	3397	3383	88	234.5
275.8		3741	3727	99	3402	3388	87	234.7
276		3747	3732	99	3408	3393	88	234.9
276.2		3754	3740	98	3412	3397	90	235.1
276.4		3759	3746	98	3417	3401	88	235.2
276.6		3765	3751	98	3422	3408	85	235.4
276.8		3771	3757	98	3429	3415	84	235.6
277		3777	3763	98	3435	3420	86	235.8
277.2		3784	3771	97	3440	3424	86	236
277.4		3790	3777	97	3444	3429	85	236.2
277.6		3796	3783	97	3450	3435	84	236.3
277.8		3802	3788	97	3456	3441	84	236.5
278		3807	3794	97	3461	3446	82	236.7
278.2		3813	3800	97	3467	3452	83	236.9
278.4		3819	3807	96	3472	3456	83	237.1
278.6		3826	3813	96	3478	3462	81	237.2
278.8		3834	3821	96	3484	3469	80	237.4
279		3842	3831	96	3492	3476	81	237.6
279.2		3848	3837	96	3499	3483	79	237.8
279.4		3854	3842	96	3505	3489	79	238
279.6		3859	3846	95	3512	3497	78	238.2
279.8		3865	3852	95	3519	3504	78	238.3
280		3871	3859	95	3525	3509	79	238.5
280.2		3877	3864	95	3530	3514	79	238.7
280.4		3882	3868	95	3535	3518	82	238.9
280.6		3890	3876	95	3539	3523	77	239.1
280.8		3896	3883	95	3546	3530	76	239.2
281		3901	3889	94	3552	3537	76	239.4
281.2		3907	3895	94	3558	3542	78	239.6
281.4		3912	3901	94	3563	3547	75	239.8
281.6		3917	3906	94	3569	3553	76	240
281.8		3924	3913	94	3575	3560	74	240.1
282		3928	3920	94	3582	3566	74	240.3
282.2		3934	3926	94	3590	3573	73	240.5
282.4		3941	3932	94	3597	3580	73	240.7
282.6		3947	3939	94	3603	3587	72	240.9
282.8		3954	3946	93	3610	3594	73	241
283		3961	3953	93	3615	3599	72	241.2
283.2		3969	3961	93	3623	3606	71	241.4
283.4		3974	3967	93	3629	3613	72	241.6
283.6		3982	3975	93	3635	3619	73	241.8
283.8		3988	3982	93	3640	3625	71	242
284		3995	3989	93	3646	3630	70	242.1
284.2		4001	3994	93	3653	3636	70	242.3
284.4		4008	4001	93	3659	3642	70	242.5
284.6		4015	4008	93	3665	3649	70	242.7
284.8		4021	4015	93	3671	3655	70	242.9
285		4027	4021	93	3676	3660	69	243
285.2		4034	4027	93	3682	3667	69	243.2
285.4		4041	4034	93	3688	3672	69	243.4
285.6		4046	4040	93	3693	3679	70	243.6
285.8		4053	4046	93	3699	3684	69	243.8
286		4059	4052	93	3704	3689	67	243.9
286.2		4065	4057	93	3711	3695	68	244.1
286.4		4070	4063	93	3717	3702	67	244.3
286.6		4077	4070	92	3724	3710	66	244.5
286.8		4083	4076	92	3731	3716	68	244.7
287		4089	4082	92	3736	3721	70	244.8
287.2		4096	4088	92	3740	3726	68	245
287.4		4102	4094	92	3746	3732	66	245.2
287.6		4107	4100	92	3753	3740	66	245.4
287.8		4113	4106	92	3759	3746	66	245.6
288		4119	4111	92	3765	3751	65	245.8
288.2		4124	4116	92	3772	3758	65	245.9
288.4		4129	4121	92	3779	3765	65	246.1
288.6		4136	4128	92	3786	3773	65	246.3
288.8		4142	4134	92	3792	3779	65	246.5
289		4147	4139	92	3798	3785	65	246.7
289.2		4154	4146	92	3804	3791	65	246.8
289.4		4159	4151	92	3810	3797	65	247
289.6		4164	4156	92	3817	3804	64	247.2
289.8		4170	4162	92	3823	3811	64	247.4
290		4178	4169	92	3831	3818	67	247.6
290.2		4186	4177	92	3840	3829	65	247.7
290.4		4192	4183	92	3847	3836	64	247.9
290.6		4200	4192	92	3854	3841	64	248.1
290.8		4206	4198	92	3859	3846	64	248.3
291		4212	4203	92	3865	3852	63	248.5
291.2		4217	4208	92	3872	3859	64	248.7
291.4		4223	4215	92	3878	3865	64	248.8
291.6		4229	4221	92	3884	3870	64	249
291.8		4236	4228	92	3892	3878	64	249.2
292		4243	4234	92	3898	3886	64	249.4
292.2		4249	4240	92	3904	3892	64	249.6
292.4		4255	4247	92	3910	3898	63	249.7
292.6		4261	4253	92	3915	3904	64	249.9
292.8		4267	4259	92	3922	3911	63	250.1
293		4273	4264	92	3927	3918	64	250.3
293.2		4279	4270	92	3933	3925	63	250.5
293.4		4286	4278	92	3940	3932	63	250.7
293.6		4293	4285	92	3947	3938	63	250.9
293.8		4298	4289	92	3954	3946	63	251
294		4304	4295	92	3961	3954	66	251.2
294.2		4312	4302	92	3970	3962	64	251.4
294.4		4319	4310	92	3976	3968	65	251.6
294.6		4325	4315	92	3984	3977	64	251.8
294.8		4330	4320	92	3991	3984	64	251.9
295		4336	4325	92	3998	3991	63	252.1
295.2		4342	4332	92	4004	3997	64	252.3
295.4		4348	4338	92	4012	4005	64	252.5
295.6		4353	4344	92	4018	4012	64	252.7
295.8		4360	4350	92	4025	4018	64	252.9
296		4366	4355	92	4032	4025	65	253.1
296.2		4373	4361	92	4039	4032	64	253.2
296.4		4379	4368	92	4045	4039	64	253.4
296.6		4386	4374	92	4053	4046	64	253.6
296.8		4393	4380	92	4059	4052	64	253.8
297		4399	4386	92	4065	4057	64	254
297.2		4404	4392	92	4071	4064	64	254.1
297.4		4409	4398	92	4078	4071	64	254.3
297.6		4414	4403	92	4085	4077	64	254.5
297.8		4420	4409	92	4091	4083	65	254.7
298		4426	4413	92	4098	4090	64	254.9
298.2		4432	4418	92	4104	4097	64	255.1
298.4		4438	4423	92	4110	4103	64	255.3
298.6		4444	4430	92	4116	4108	64	255.4
298.8		4452	4437	92	4122	4114	65	255.6
299		4459	4442	92	4127	4119	64	255.8
299.2		4464	4447	92	4134	4126	65	256
299.4		4469	4453	92	4141	4133	64	256.2
299.6		4475	4459	92	4146	4138	65	256.4
299.8		4481	4465	91	4154	4145	65	256.5
300		4487	4470	91	4159	4151	65	256.7
300.2		4493	4476	91	4164	4156	65	256.9
300.4		4498	4481	91	4170	4163	66	257.1
300.6		4506	4490	91	4179	4171	69	257.3
300.8		4513	4497	91	4187	4178	65	257.5
301		4520	4503	91	4194	4186	67	257.6
301.2		4527	4510	91	4201	4194	65	257.8
301.4		4533	4516	91	4208	4200	65	258
301.6		4538	4521	91	4214	4205	65	258.2
301.8		4543	4526	91	4220	4211	65	258.4
302		4548	4532	91	4226	4218	65	258.6
302.2		4555	4538	91	4233	4225	66	258.7
302.4		4560	4543	91	4240	4232	66	258.9
302.6		4565	4549	91	4247	4238	65	259.1
302.8		4571	4556	91	4253	4245	65	259.3
303		4577	4561	91	4259	4252	65	259.5
303.2		4583	4566	91	4265	4258	65	259.7
303.4		4588	4572	91	4272	4264	65	259.8
303.6		4594	4579	91	4278	4270	66	260
303.8		4603	4587	90	4285	4277	66	260.2
304		4610	4594	90	4293	4284	65	260.4
304.2		4615	4599	90	4298	4289	65	260.6
304.4		4620	4605	90	4305	4295	67	260.8
304.6		4626	4611	90	4313	4303	67	260.9
304.8		4633	4617	90	4320	4310	65	261.1
305		4638	4623	90	4326	4316	65	261.3
305.2		4644	4628	90	4332	4322	65	261.5
305.4		4650	4635	90	4337	4327	65	261.7
305.6		4656	4640	90	4344	4334	65	261.9
305.8		4661	4645	90	4350	4340	65	262
306		4667	4650	90	4356	4346	65	262.2
306.2		4673	4655	90	4363	4352	65	262.4
306.4		4678	4660	90	4369	4358	66	262.6
306.6		4683	4665	90	4376	4364	65	262.8
306.8		4691	4673	90	4383	4372	66	263
307		4696	4678	90	4390	4378	65	263.1
307.2		4701	4683	90	4397	4384	65	263.3
307.4		4707	4688	89	4402	4390	65	263.5
307.6		4714	4695	89	4408	4396	65	263.7
307.8		4721	4702	89	4413	4402	65	263.9
308		4726	4707	89	4419	4408	64	264.1
308.2		4732	4713	89	4425	4413	65	264.2
308.4		4738	4718	89	4431	4417	64	264.4
308.6		4744	4724	89	4437	4423	64	264.6
308.8		4750	4731	89	4444	4430	66	264.8
309		4756	4737	89	4452	4437	65	265
309.2		4763	4743	89	4459	4443	64	265.2
309.4		4769	4749	89	4464	4448	64	265.3
309.6		4775	4755	89	4470	4453	64	265.5
309.8		4781	4762	89	4476	4460	64	265.7
310		4786	4766	88	4482	4466	64	265.9
310.2		4793	4772	88	4488	4472	64	266.1
310.4		4799	4778	88	4494	4477	64	266.3
310.6		4804	4783	88	4501	4484	65	266.4
310.8		4809	4788	88	4508	4492	65	266.6
311		4815	4794	88	4516	4499	63	266.8
311.2		4822	4801	88	4523	4506	64	267
311.4		4828	4807	88	4530	4513	63	267.2
311.6		4835	4814	88	4535	4519	64	267.4
311.8		4842	4821	88	4540	4524	64	267.5
312		4848	4827	88	4546	4529	63	267.7
312.2		4855	4833	88	4552	4535	63	267.9
312.4		4862	4840	88	4558	4541	63	268.1
312.6		4869	4847	88	4564	4547	63	268.3
312.8		4875	4853	87	4570	4554	62	268.5
313		4881	4859	87	4576	4560	62	268.6
313.2		4888	4865	87	4582	4565	62	268.8
313.4		4895	4873	87	4587	4571	62	269
313.6		4901	4880	87	4593	4578	62	269.2
313.8		4906	4885	87	4602	4587	65	269.4
314		4912	4891	87	4609	4593	62	269.6
314.2		4919	4898	87	4614	4598	62	269.7
314.4		4926	4905	87	4620	4604	61	269.9
314.6		4932	4912	87	4626	4611	61	270.1
314.8		4938	4918	87	4632	4617	61	270.3
315		4943	4923	87	4638	4623	61	270.5
315.2		4949	4929	87	4644	4628	61	270.7
315.4		4955	4936	87	4651	4635	61	270.8
315.6		4961	4942	87	4656	4641	61	271
315.8		4967	4948	87	4662	4646	61	271.2
316		4973	4954	87	4667	4650	61	271.4
316.2		4979	4960	87	4673	4655	60	271.6
316.4		4985	4966	87	4679	4661	61	271.8
316.6		4991	4973	87	4684	4666	60	271.9
316.8		4998	4980	87	4691	4674	60	272.1
317		5005	4986	87	4697	4679	61	272.3
317.2		5010	4991	87	4702	4684	60	272.5
317.4		5017	4999	87	4709	4689	59	272.7
317.6		5022	5004	87	4715	4697	59	272.9
317.8		5031	5012	87	4722	4703	59	273
318		5037	5018	87	4727	4708	59	273.2
318.2		5043	5024	87	4733	4714	59	273.4
318.4		5048	5030	87	4739	4719	59	273.6
318.6		5054	5035	87	4745	4726	59	273.8
318.8		5059	5040	87	4751	4732	59	274
319		5066	5047	87	4758	4739	59	274.1
319.2		5074	5055	87	4765	4745	58	274.3
319.4		5081	5062	87	4771	4751	58	274.5
319.6		5088	5069	87	4777	4757	58	274.7
319.8		5099	5079	87	4783	4763	60	274.9
320		5105	5086	87	4788	4768	58	275.1
320.2		5111	5092	87	4795	4774	58	275.2
320.4		5118	5098	87	4801	4780	59	275.4
320.6		5124	5104	87	4806	4785	61	275.6
320.8		5130	5110	87	4811	4791	58	275.8
321		5136	5116	87	4818	4797	58	276
321.2		5142	5122	87	4824	4803	58	276.2
321.4		5148	5127	87	4831	4810	58	276.3
321.6		5154	5133	87	4838	4817	58	276.5
321.8		5161	5140	87	4845	4824	58	276.7
322		5167	5146	87	4851	4830	59	276.9
322.2		5173	5152	87	4859	4837	58	277.1
322.4		5180	5158	87	4865	4843	58	277.3
322.6		5186	5164	87	4872	4851	57	277.4
322.8		5194	5171	87	4878	4856	57	277.6
323		5200	5178	87	4885	4863	58	277.8
323.2		5207	5184	88	4892	4870	58	278
323.4		5217	5193	88	4898	4877	57	278.2
323.6		5224	5200	88	4904	4884	57	278.4
323.8		5229	5206	88	4910	4889	57	278.5
324		5236	5213	88	4917	4896	58	278.7
324.2		5243	5218	88	4924	4903	57	278.9
324.4		5250	5225	88	4931	4911	57	279.1
324.6		5257	5232	88	4937	4917	57	279.3
324.8		5263	5239	88	4942	4922	57	279.5
325		5270	5245	88	4949	4928	57	279.6
325.2		5276	5251	89	4955	4935	57	279.8
325.4		5282	5256	89	4960	4941	57	280
325.6		5287	5262	89	4967	4948	57	280.2
325.8		5293	5268	89	4973	4954	57	280.4
326		5300	5275	89	4979	4960	57	280.6
326.2		5308	5283	89	4985	4967	57	280.7
326.4		5314	5288	89	4992	4974	58	280.9
326.6		5321	5295	89	4999	4981	58	281.1
326.8		5329	5304	89	5006	4987	58	281.3
327		5335	5310	89	5012	4993	57	281.5
327.2		5340	5314	90	5019	5000	57	281.7
327.4		5346	5320	90	5025	5006	59	281.8
327.6		5353	5327	90	5033	5014	58	282
327.8		5359	5334	90	5039	5020	57	282.2
328		5366	5340	90	5045	5027	58	282.4
328.2		5370	5344	90	5051	5032	58	282.6
328.4		5376	5350	90	5056	5038	58	282.8
328.6		5384	5359	90	5063	5044	59	282.9
328.8		5389	5364	90	5070	5051	59	283.1
329		5394	5368	91	5078	5059	58	283.3
329.2		5400	5373	91	5085	5067	60	283.5
329.4		5406	5379	91	5095	5075	73	283.7
329.6		5412	5386	91	5103	5083	58	283.9
329.8		5420	5393	91	5109	5090	58	284
330		5425	5398	91	5116	5097	59	284.2
330.2		5431	5404	91	5122	5102	58	284.4
330.4		5437	5409	91	5129	5108	58	284.6
330.6		5442	5416	92	5135	5115	58	284.8
330.8		5448	5422	92	5142	5122	59	285
331		5455	5429	92	5148	5127	59	285.1
331.2		5462	5435	92	5154	5133	59	285.3
331.4		5467	5440	92	5161	5139	59	285.5
331.6		5473	5447	92	5167	5146	59	285.7
331.8		5478	5453	92	5174	5153	59	285.9
332		5485	5459	93	5180	5159	60	286.1
332.2		5492	5465	93	5188	5165	61	286.2
332.4		5499	5472	93	5195	5173	60	286.4
332.6		5507	5481	93	5202	5180	60	286.6
332.8		5512	5486	93	5210	5187	70	286.8
333		5519	5493	94	5219	5196	62	287
333.2		5525	5498	94	5226	5202	60	287.2
333.4		5532	5505	94	5232	5209	61	287.3
333.6		5538	5511	94	5239	5216	60	287.5
333.8		5544	5517	94	5247	5222	63	287.7
334		5549	5522	94	5254	5229	61	287.9
334.2		5554	5527	94	5261	5236	61	288.1
334.4		5560	5533	95	5268	5243	61	288.3
334.6		5567	5540	95	5274	5249	61	288.4
334.8		5573	5546	95	5280	5255	61	288.6
335		5580	5552	95	5286	5261	61	288.8
335.2		5587	5559	95	5293	5268	61	289
335.4		5593	5565	95	5300	5275	63	289.2
335.6		5599	5572	96	5308	5283	63	289.4
335.8		5605	5577	96	5315	5289	62	289.5
336		5612	5584	96	5322	5296	64	289.7
336.2		5617	5589	96	5330	5305	63	289.9
336.4		5623	5595	96	5336	5310	63	290.1
336.6		5629	5601	96	5341	5315	63	290.3
336.8		5634	5606	97	5348	5322	63	290.5
337		5640	5613	97	5355	5330	63	290.6
337.2		5647	5619	97	5362	5336	63	290.8
337.4		5654	5627	97	5368	5342	64	291
337.6		5660	5634	97	5373	5347	63	291.2
337.8		5667	5640	97	5381	5355	65	291.4
338		5675	5648	98	5387	5362	65	291.6
338.2		5682	5655	98	5392	5366	65	291.7
338.4		5688	5662	98	5398	5372	64	291.9
338.6		5694	5667	98	5405	5378	64	292.1
338.8		5701	5674	98	5411	5385	64	292.3
339		5709	5681	98	5419	5393	65	292.5
339.2		5716	5689	99	5425	5398	65	292.7
339.4		5725	5698	99	5431	5404	65	292.8
339.6		5731	5703	99	5437	5410	65	293
339.8		5739	5711	99	5443	5417	65	293.2
340		5745	5718	99	5450	5423	65	293.4
340.2		5752	5725	100	5457	5430	66	293.6
340.4		5759	5731	100	5463	5436	66	293.8
340.6		5764	5736	100	5469	5442	66	293.9
340.8		5769	5741	100	5475	5449	66	294.1
341		5775	5748	100	5481	5455	66	294.3
341.2		5781	5754	100	5488	5462	67	294.5
341.4		5787	5760	101	5496	5469	67	294.7
341.6		5794	5767	101	5504	5478	68	294.9
341.8		5801	5774	101	5511	5485	67	295
342		5809	5783	101	5517	5491	67	295.2
342.2		5817	5790	101	5524	5496	67	295.4
342.4		5825	5798	102	5530	5503	67	295.6
342.6		5831	5804	102	5537	5510	68	295.8
342.8		5837	5810	102	5543	5516	68	296
343		5843	5816	102	5549	5522	69	296.1
343.2		5850	5823	102	5555	5527	69	296.3
343.4		5858	5830	103	5561	5533	68	296.5
343.6		5867	5840	103	5568	5541	68	296.7
343.8		5873	5846	103	5574	5547	68	296.9
344		5880	5853	103	5582	5554	69	297.1
344.2		5887	5860	103	5589	5561	69	297.2
344.4		5893	5867	104	5596	5568	69	297.4
344.6		5901	5874	104	5602	5574	70	297.6
344.8		5909	5882	104	5609	5581	70	297.8
345		5917	5889	104	5615	5586	71	298
345.2		5925	5898	104	5621	5592	70	298.2
345.4		5931	5905	105	5627	5599	70	298.3
345.6		5938	5911	105	5632	5605	71	298.5
345.8		5945	5918	105	5639	5611	70	298.7
346		5952	5925	105	5646	5618	70	298.9
346.2		5959	5932	105	5653	5626	70	299.1
346.4		5965	5938	106	5660	5634	70	299.3
346.6		5972	5944	106	5667	5640	71	299.4
346.8		5979	5951	106	5676	5648	71	299.6
347		5987	5960	106	5683	5656	71	299.8
347.2		5996	5968	106	5689	5663	72	300
347.4		6002	5974	107	5696	5669	71	300.2
347.6		6009	5981	107	5703	5676	72	300.4
347.8		6016	5988	107	5711	5684	72	300.5
348		6024	5997	107	5719	5693	75	300.7
348.2		6032	6004	108	5727	5700	73	300.9
348.4		6040	6012	108	5735	5707	74	301.1
348.6		6048	6021	108	5742	5715	73	301.3
348.8		6058	6030	108	5749	5722	73	301.5
349		6065	6038	109	5757	5729	73	301.6
349.2		6073	6046	109	5763	5735	75	301.8
349.4		6082	6056	109	5768	5740	75	302
349.6		6089	6062	109	5774	5747	74	302.2
349.8		6099	6071	110	5781	5754	74	302.4
350		6106	6079	110	5787	5760	74	302.6
350.2		6114	6087	110	5795	5767	74	302.7
350.4		6123	6095	111	5802	5775	74	302.9
350.6		6131	6103	111	5811	5784	75	303.1
350.8		6139	6111	111	5819	5792	75	303.3
351		6146	6118	112	5827	5799	75	303.5
351.2		6153	6125	112	5833	5806	76	303.7
351.4		6163	6134	112	5839	5813	75	303.9
351.6		6172	6144	112	5846	5819	75	304
351.8		6180	6152	113	5854	5827	75	304.2
352		6189	6159	113	5863	5836	77	304.4
352.2		6196	6168	113	5871	5844	76	304.6
352.4		6204	6176	114	5878	5851	76	304.8
352.6		6212	6183	114	5885	5858	76	304.9
352.8		6220	6190	114	5892	5865	76	305.1
353		6227	6198	115	5900	5874	76	305.3
353.2		6236	6207	115	5908	5881	77	305.5
353.4		6243	6214	115	5917	5889	77	305.7
353.6		6250	6220	115	5925	5898	77	305.9
353.8		6258	6229	116	5932	5905	77	306.1
354		6265	6236	116	5940	5913	77	306.2
354.2		6273	6243	116	5947	5919	77	306.4
354.4		6281	6251	117	5954	5927	78	306.6
354.6		6291	6262	117	5961	5934	79	306.8
354.8		6300	6270	117	5968	5940	78	307
355		6308	6278	118	5975	5947	78	307.1
355.2		6315	6286	118	5983	5956	79	307.3
355.4		6323	6294	118	5992	5965	80	307.5
355.6		6332	6303	119	6000	5972	80	307.7
355.8		6340	6311	119	6007	5979	80	307.9
356		6349	6322	120	6014	5987	80	308.1
356.2		6357	6331	120	6023	5996	80	308.3
356.4		6366	6339	120	6031	6004	80	308.4
356.6		6374	6348	121	6039	6011	81	308.6
356.8		6382	6357	121	6048	6021	83	308.8
357		6392	6366	122	6059	6031	82	309
357.2		6401	6376	122	6067	6039	82	309.2
357.4		6408	6383	122	6075	6049	83	309.3
357.6		6417	6392	123	6084	6057	83	309.5
357.8		6426	6401	123	6093	6065	85	309.7
358		6435	6410	124	6102	6074	84	309.9
358.2		6442	6418	124	6110	6083	85	310.1
358.4		6452	6427	124	6119	6092	85	310.3
358.6		6459	6434	125	6128	6100	85	310.5
358.8		6466	6442	125	6136	6109	85	310.6
359		6475	6450	126	6144	6117	86	310.8
359.2		6485	6460	126	6152	6124	86	311
359.4		6495	6472	127	6162	6133	88	311.2
359.6		6504	6480	127	6171	6144	88	311.4
359.8		6514	6491	128	6181	6152	88	311.6
360		6522	6500	128	6189	6160	88	311.7
360.2		6532	6509	128	6198	6169	89	311.9
360.4		6542	6519	129	6206	6177	89	312.1
360.6		6551	6530	129	6214	6185	90	312.3
360.8		6562	6541	130	6222	6193	90	312.5
361		6571	6550	130	6231	6202	91	312.7
361.2		6580	6561	131	6240	6210	91	312.8
361.4		6588	6568	131	6247	6217	92	313
361.6		6597	6577	132	6255	6226	92	313.2
361.8		6606	6587	132	6263	6234	92	313.4
362		6617	6598	133	6271	6241	93	313.6
362.2		6626	6606	133	6280	6250	95	313.8
362.4		6635	6615	133	6290	6261	96	313.9
362.6		6645	6625	134	6300	6270	95	314.1
362.8		6654	6635	134	6309	6278	95	314.3
363		6664	6645	135	6316	6287	96	314.5
363.2		6672	6654	135	6324	6295	97	314.7
363.4		6682	6663	136	6334	6304	98	314.9
363.6		6691	6672	136	6343	6314	98	315
363.8		6699	6682	136	6352	6325	98	315.2
364		6709	6692	137	6361	6334	100	315.4
364.2		6718	6701	137	6370	6344	99	315.6
364.4		6727	6710	138	6378	6353	100	315.8
364.6		6735	6718	138	6388	6363	103	316
364.8		6745	6728	138	6398	6373	102	316.1
365		6753	6737	139	6406	6382	102	316.3
365.2		6764	6748	139	6415	6390	103	316.5
365.4		6772	6756	140	6425	6399	104	316.7
365.6		6783	6768	140	6434	6410	104	316.9
365.8		6793	6778	140	6442	6418	104	317.1
366		6802	6787	141	6452	6427	105	317.2
366.2		6812	6798	141	6460	6435	105	317.4
366.4		6822	6808	142	6467	6444	106	317.6
366.6		6831	6816	142	6477	6453	108	317.8
366.8		6842	6829	142	6487	6463	110	318
367		6852	6839	143	6498	6475	109	318.2
367.2		6862	6848	143	6508	6484	112	318.3
367.4		6873	6861	143	6518	6495	109	318.5
367.6		6883	6871	144	6527	6505	111	318.7
367.8		6893	6880	144	6537	6515	112	318.9
368		6901	6889	144	6548	6526	113	319.1
368.2		6910	6898	145	6558	6538	114	319.3
368.4		6918	6906	145	6569	6548	113	319.4
368.6		6927	6915	145	6578	6558	113	319.6
368.8		6936	6925	145	6587	6567	113	319.8
369		6946	6934	146	6596	6576	114	320
369.2		6956	6945	146	6606	6586	116	320.2
369.4		6967	6956	146	6617	6598	116	320.4
369.6		6977	6965	146	6626	6606	115	320.5
369.8		6987	6976	147	6636	6616	117	320.7
370		6996	6986	147	6646	6627	117	320.9
370.2		7009	6997	147	6656	6636	118	321.1
370.4		7018	7008	147	6666	6647	117	321.3
370.6		7030	7020	148	6675	6657	118	321.5
370.8		7042	7031	148	6685	6666	118	321.6
371		7052	7042	148	6694	6676	118	321.8
371.2		7062	7051	148	6704	6686	120	322
371.4		7072	7060	148	6714	6696	120	322.2
371.6		7081	7070	148	6723	6706	120	322.4
371.8		7093	7081	149	6732	6715	120	322.6
372		7104	7091	149	6742	6725	121	322.7
372.2		7116	7104	149	6751	6735	121	322.9
372.4		7126	7113	149	6762	6746	123	323.1
372.6		7135	7121	149	6771	6755	122	323.3
372.8		7145	7132	149	6782	6767	124	323.5
373		7153	7140	149	6793	6778	123	323.7
373.2		7163	7149	149	6803	6788	124	323.8
373.4		7173	7159	149	6813	6799	124	324
373.6		7184	7170	150	6823	6809	124	324.2
373.8		7192	7178	150	6833	6819	125	324.4
374		7203	7190	150	6845	6832	126	324.6
374.2		7213	7200	150	6856	6842	125	324.8
374.4		7224	7211	150	6866	6853	127	324.9
374.6		7234	7223	150	6878	6865	127	325.1
374.8		7243	7232	150	6888	6875	125	325.3
375		7252	7240	150	6897	6885	125	325.5
375.2		7260	7250	149	6907	6895	126	325.7
375.4		7268	7257	149	6916	6904	125	325.9
375.6		7277	7265	149	6925	6913	126	326
375.8		7287	7277	149	6935	6924	126	326.2
376		7299	7288	149	6945	6933	127	326.4
376.2		7309	7297	149	6956	6944	127	326.6
376.4		7319	7308	149	6967	6956	127	326.8
376.6		7331	7320	149	6977	6966	127	327
376.8		7341	7329	148	6988	6977	127	327.1
377		7353	7342	148	6999	6988	129	327.3
377.2		7364	7352	148	7011	7000	127	327.5
377.4		7377	7365	148	7022	7012	129	327.7
377.6		7388	7376	148	7035	7024	129	327.9
377.8		7396	7384	147	7046	7036	127	328.1
378		7405	7393	147	7057	7047	127	328.2
378.2		7416	7404	147	7068	7056	127	328.4
378.4		7429	7416	147	7078	7067	127	328.6
378.6		7439	7427	146	7090	7078	128	328.8
378.8		7448	7435	146	7101	7089	128	329
379		7457	7444	146	7115	7103	128	329.2
379.2		7468	7454	145	7125	7112	126	329.3
379.4		7478	7465	145	7135	7121	126	329.5
379.6		7489	7475	145	7145	7133	126	329.7
379.8		7498	7484	145	7154	7141	126	329.9
380		7508	7495	144	7165	7151	125	330.1
380.2		7520	7506	144	7175	7162	126	330.3
380.4		7531	7517	144	7186	7172	125	330.4
380.6		7542	7528	143	7196	7182	125	330.6
380.8		7552	7537	143	7207	7194	124	330.8
381		7565	7551	142	7218	7205	124	331
381.2		7577	7563	142	7230	7218	124	331.2
381.4		7588	7573	142	7240	7229	124	331.4
381.6		7600	7586	141	7249	7237	124	331.5
381.8		7610	7595	141	7258	7247	124	331.7
382		7620	7606	140	7266	7256	123	331.9
382.2		7633	7618	140	7275	7264	122	332.1
382.4		7644	7629	139	7286	7276	122	332.3
382.6		7653	7639	139	7298	7287	121	332.5
382.8		7664	7649	139	7309	7298	121	332.6
383		7674	7659	138	7320	7309	120	332.8
383.2		7685	7671	138	7332	7321	119	333
383.4		7693	7679	137	7343	7331	119	333.2
383.6		7704	7689	137	7356	7345	118	333.4
383.8		7714	7700	136	7368	7356	118	333.6
384		7725	7710	136	7381	7369	117	333.7
384.2		7735	7720	135	7392	7380	118	333.9
384.4		7745	7731	135	7401	7388	117	334.1
384.6		7754	7740	134	7412	7400	115	334.3
384.8		7764	7749	134	7424	7412	114	334.5
385		7774	7760	133	7436	7423	114	334.7
385.2		7783	7769	133	7446	7433	115	334.8
385.4		7795	7779	132	7455	7442	113	335
385.6		7805	7790	132	7466	7453	112	335.2
385.8		7816	7801	131	7477	7464	111	335.4
386		7827	7811	131	7489	7475	110	335.6
386.2		7837	7822	130	7498	7485	110	335.8
386.4		7849	7833	130	7509	7496	108	335.9
386.6		7859	7843	129	7522	7507	107	336.1
386.8		7869	7854	129	7533	7519	106	336.3
387		7878	7862	128	7544	7530	106	336.5
387.2		7887	7869	128	7556	7541	104	336.7
387.4		7897	7879	127	7569	7555	103	336.9
387.6		7905	7886	127	7582	7567	102	337
387.8		7914	7895	127	7594	7580	101	337.2
388		7925	7906	126	7605	7590	102	337.4
388.2		7936	7917	126	7616	7601	100	337.6
388.4		7945	7925	125	7628	7614	98	337.8
388.6		7956	7938	125	7640	7626	98	338
388.8		7967	7948	124	7651	7636	99	338.1
389		7975	7956	124	7661	7647	96	338.3
389.2		7984	7966	124	7673	7658	95	338.5
389.4		7995	7976	123	7683	7669	96	338.7
389.6		8004	7985	123	7693	7678	96	338.9
389.8		8015	7995	123	7704	7689	93	339.1
390		8025	8006	122	7714	7700	92	339.2
390.2		8036	8016	122	7726	7711	91	339.4
390.4		8047	8027	121	7736	7721	90	339.6
390.6		8058	8038	121	7747	7733	91	339.8
390.8		8068	8047	121	7756	7742	90	340
391		8079	8058	120	7766	7751	88	340.2
391.2		8093	8071	120	7777	7762	88	340.4
391.4		8108	8085	120	7787	7772	84	340.5
391.6		8120	8097	119	7798	7783	84	340.7
391.8		8133	8110	119	7809	7795	81	340.9
392		8146	8124	119	7821	7805	80	341.1
392.2		8161	8137	118	7832	7817	81	341.3
392.4		8176	8153	118	7843	7828	77	341.4
392.6		8191	8166	118	7854	7838	78	341.6
392.8		8206	8182	118	7865	7850	77	341.8
393		8219	8194	118	7875	7859	80	342
393.2		8234	8209	117	7885	7866	79	342.2
393.4		8250	8223	117	7894	7876	78	342.4
393.6		8266	8239	117	7903	7885	80	342.6
393.8		8283	8254	117	7913	7894	74	342.7
394		8299	8272	118	7923	7905	70	342.9
394.2		8318	8292	118	7934	7916	71	343.1
394.4		8334	8308	118	7944	7925	71	343.3
394.6		8350	8323	118	7955	7937	66	343.5
394.8		8367	8339	118	7967	7948	70	343.6
395		8383	8353	119	7975	7956	73	343.8
395.2		8399	8369	119	7985	7967	67	344
395.4		8414	8383	120	7996	7977	66	344.2
395.6		8430	8399	120	8006	7987	66	344.4
395.8		8446	8414	121	8017	7998	64	344.6
396		8462	8430	121	8028	8008	60	344.8
396.2		8476	8443	122	8039	8019	61	344.9
396.4		8490	8457	122	8050	8030	58	345.1
396.6		8504	8470	123	8062	8041	61	345.3
396.8		8520	8487	124	8073	8051	58	345.5
397		8532	8498	124	8085	8064	52	345.7
397.2		8548	8514	125	8100	8077	50	345.8
397.4		8562	8527	126	8114	8092	53	346
397.6		8575	8541	126	8127	8104	50	346.2
397.8		8590	8555	127	8141	8118	51	346.4
398		8603	8570	128	8155	8132	50	346.6
[truncated: 1,260 more rows]
